# Supplementary material for: Antioxidant Activity of Plant-Derived Colorants for Potential Cosmetic Application
Source: MDPI journal article supplement (doi:10.3390/cosmetics9040081), 2022-08-02
Supplement: s1 [file s1]

Archive with 1 entries (1 files):
- cosmetics-1758848-supplementary.pdf
